# Supplementary material for: Phytol-loaded soybean oil nanoemulsion as a promising alternative against Leishmania amazonensis
Source: publisher site journal article supplement (doi:10.3762/bjnano.16.126), 2025-10-21
Supplement: Additional file 1 [file 2190-4286-16-126-S1.pdf]

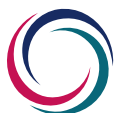

## Supporting Information

for

### **Phytol-loaded soybean oil nanoemulsion as a promising alternative against *Leishmania amazonensis***

Victória Louise Pinto Freire, Mariana Farias Alves-Silva, Johny W. de Freitas Oliveira, Matheus de Freitas Fernandes-Pedrosa, Alianda Maira Cornélio, Marcelo de Souza-Silva, Thayse Silva Medeiros and Arnóbio Antônio da Silva Junior

*Beilstein J. Nanotechnol.* **2025**, *16*, 1826–1836. doi:10.3762/bjnano.16.126

## Additional figure

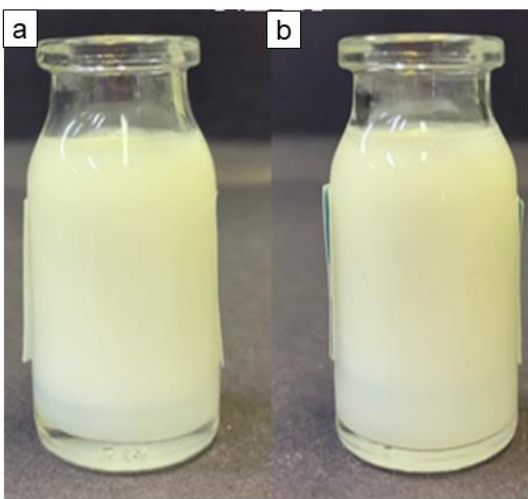

**Figure S1:** Macroscopic appearance of the nanoemulsions after 24 h of preparation.  
(a) Blank-NE; (b) PHYT-NE.
